# Supplementary material
Source: PubMed Central journal article supplement (PMC3293616)
Supplement: mt2011188x1.pdf [file mt2011188x1.pdf]

Table S1

| <b>Animal</b> | <b>Dominant Peptide</b> | <b>Position</b> | <b>Possible Subdominant Peptides</b> | <b>Position</b> |
|---------------|-------------------------|-----------------|--------------------------------------|-----------------|
| Rh7.4         | SDLYLVTRHADVIPV         | NS3 1128 → 1142 | VCTRGVAKAVDFIPV                      | NS3 1184 → 1198 |
|               |                         |                 | MRSVFTDNSSPPAV                       | NS3 1205 → 1219 |
|               |                         |                 | APITYSTYGKFLADG                      | NS3 1289 → 1303 |
|               |                         |                 | YDIIICDECHSTDST                      | NS3 1310 → 1324 |
|               |                         |                 | TVLDQAETAGARLVV                      | NS3 1331 → 1345 |
|               |                         |                 | PGSVTVPHPNIEEVA                      | NS3 1352 → 1366 |
|               |                         |                 | CHSKKKCDELAALKS                      | NS3 1394 → 1408 |
|               |                         |                 | VAYYRGLDVSVIPTS                      | NS3 1415 → 1429 |
|               |                         |                 | CVTQTVDFSLDPTFT                      | NS3 1457 → 1471 |
|               |                         |                 | ETSVRLRAYLNTPGL                      | NS3 1534 → 1548 |
|               |                         |                 | LEFWESVFTGLTHID                      | NS3 1555 → 1569 |
|               |                         |                 | AQAPPPSWDQMWKCL                      | NS3 1597 → 1611 |
| Rh7.5         | TCINGVCWTVYHGAG         | NS3 1072 → 1086 | ALSNTGEIPFYGKAI                      | NS3 1366 → 1380 |
|               |                         |                 | SGDVVVVATDALMTG                      | NS3 1429 → 1443 |
|               |                         |                 | FSLDPTFTIETTTVP                      | NS3 1464 → 1478 |
